# Supplementary material for: Wide bandgap materials design toward tunable bandgap and increased carries injection property: silane interrupting π-conjugation together with peripheralcarbazolyl substituents
Source: Royal Society of Chemistry journal article supplement (doi:10.1039/c4ra16797j), 2015-01-01
Supplement: c4ra16797j1.pdf [file c4ra16797j1.pdf]

Supplementary Information:

**Wide Bandgap Materials Design toward Tunable Bandgap and Increased Carries Injection Property: Silane Interrupting  $\pi$ -conjugation Together with Peripheralcarbazolyl Substituents**

Dehua Hu,<sup>a</sup> He Liu,<sup>b</sup> Ping Lu,<sup>\*b</sup> Fangzhong Shen,<sup>b</sup> Ying Lv,<sup>b</sup> Yuguang Ma<sup>\*ab</sup>

<sup>a</sup>Institute of Polymer Optoelectronic Materials and Devices, State Key Laboratory of Luminescent Materials and Devices, South China University of Technology, Guangzhou 510640, China

<sup>b</sup>State Key Laboratory of Supramolecular Structure and Materials, Jilin University, Changchun 130012, People's Republic of China

\* Corresponding author: Prof. Dr. Yuguang Ma, E-mail: [ygma@scut.edu.cn](mailto:ygma@scut.edu.cn), Prof. Dr. Ping Lu, E-mail: [lup@jlu.edu.cn](mailto:lup@jlu.edu.cn)

**Table of Contents**

|                                                                                              |     |
|----------------------------------------------------------------------------------------------|-----|
| <i>Figure S1.</i> (a) <sup>1</sup> H NMR and (b) <sup>13</sup> C NMR (b) spectra of SiPPF.   | (1) |
| <i>Figure S2.</i> (a) <sup>1</sup> H NMR and (b) <sup>13</sup> C NMR (b) spectra of SiPPFCz. | (2) |
| <i>Figure S3.</i> (a) <sup>1</sup> H NMR and (b) <sup>13</sup> C NMR (b) spectra of SiPF.    | (3) |
| <i>Figure S4.</i> (a) <sup>1</sup> H NMR and (b) <sup>13</sup> C NMR (b) spectra of SiPFCz.  | (4) |
| <i>Figure S5.</i> The PL spectra of polymers and oligomer in films.                          | (5) |

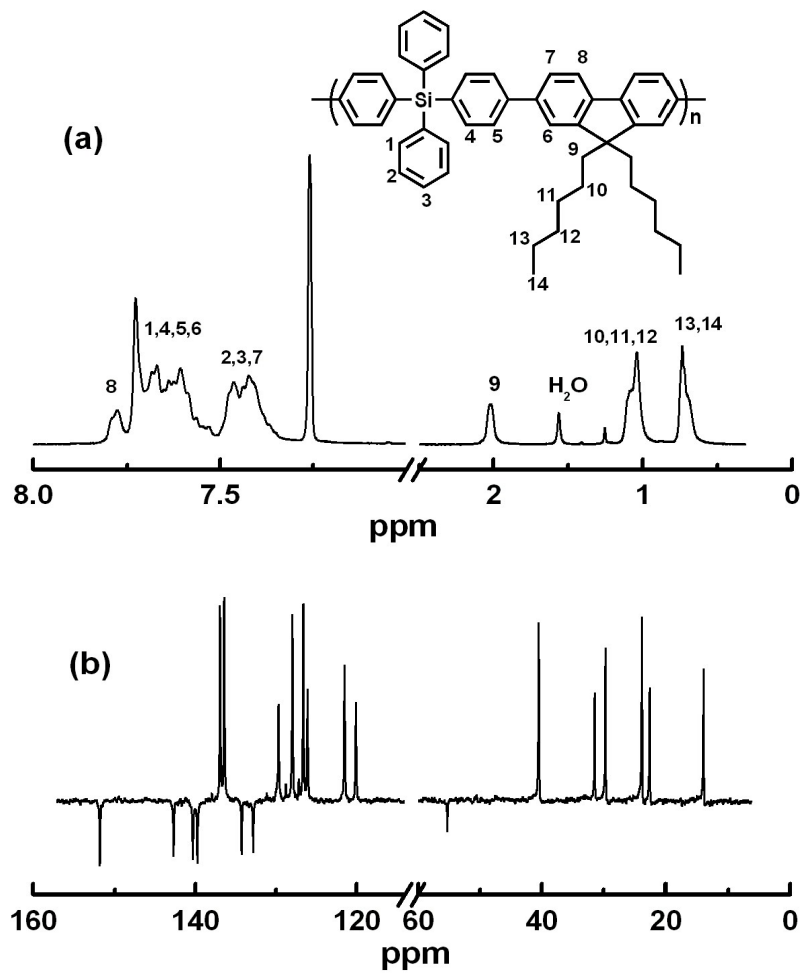

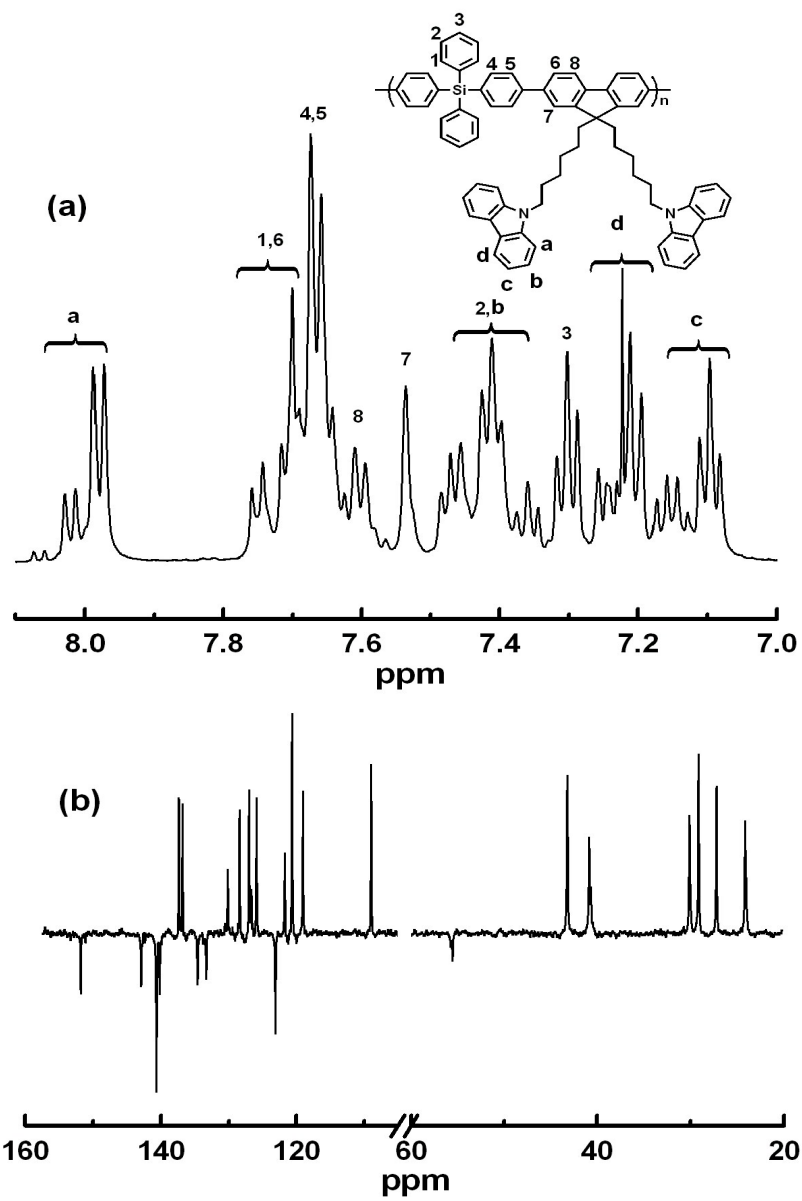

Figure S2. (a)  $^1\text{H}$  NMR and (b)  $^{13}\text{C}$  NMR spectra of SiPPFCz.

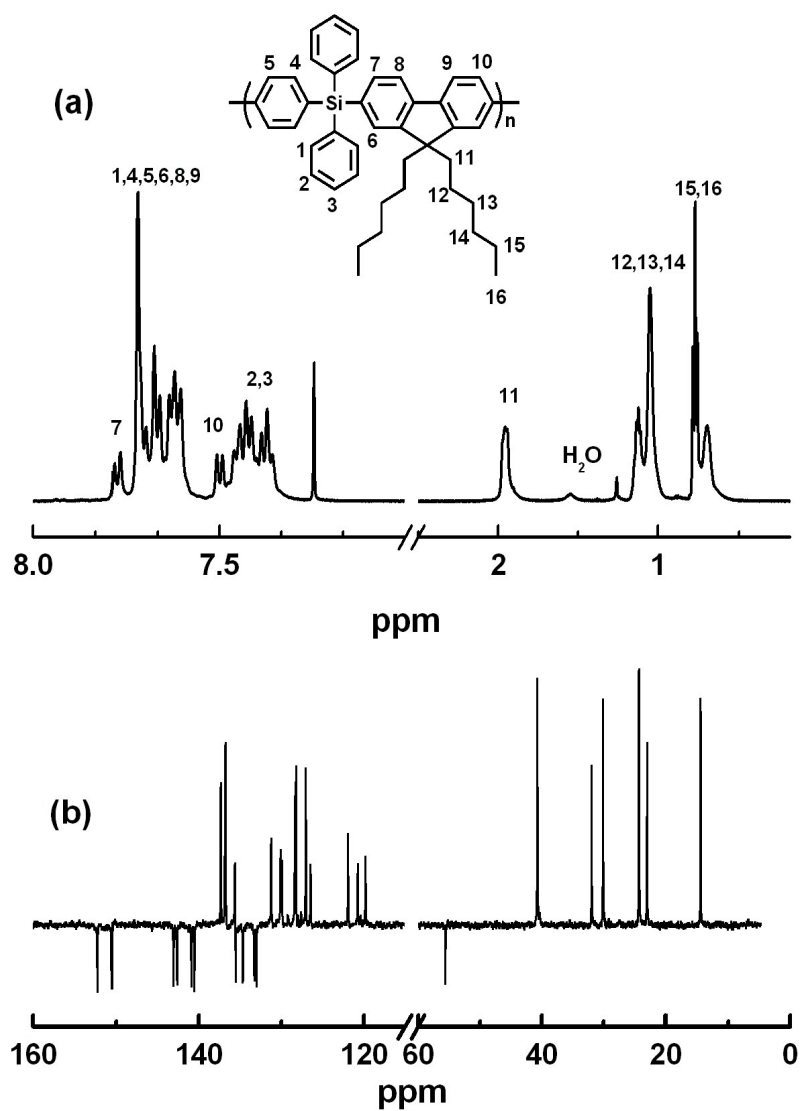

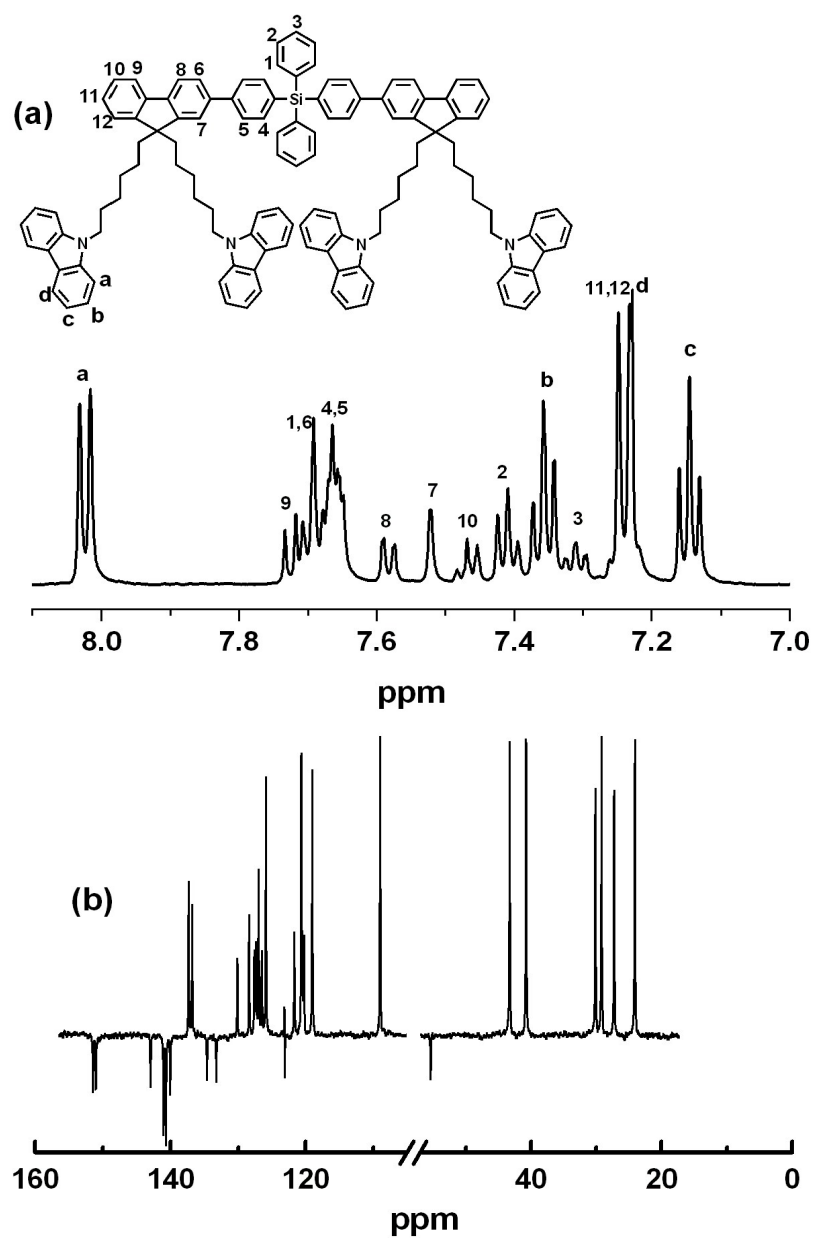

Figure S4. (a) <sup>1</sup>H NMR and (b) <sup>13</sup>C NMR (b) spectra of SiPFCz.

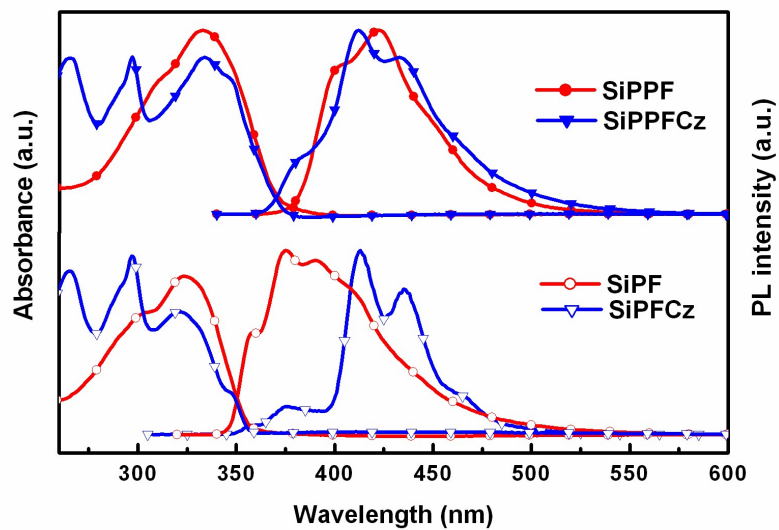

Figure S5. The PL spectra of polymers and oligomer in films.
